# Supplementary material for: Temperature and pressure dependent luminescence mechanism of a zinc blende structured ZnS:Mn nanophosphor under UV excitation
Source: Royal Society of Chemistry journal article supplement (doi:10.1039/d4tc00960f), 2024-01-01
Supplement: d4tc00960f1.pdf [file d4tc00960f1.pdf]

## Temperature and Pressure Dependent Luminescence Mechanism of Cubic Structured ZnS:Mn Nanophosphor under UV Excitation

A.K. Somakumar <sup>a</sup>, Y. Zhydachevskyy <sup>a</sup>, D. Włodarczyk <sup>a</sup>, S.S Haider <sup>a</sup>, J. Barzowska <sup>b</sup>, K.R Bindu <sup>c</sup>, Y. K. Edathumkandy <sup>a</sup>, Tatiana Zajarniuk<sup>a</sup>, A. Szewczyk<sup>a</sup>, S. Narayanan <sup>a</sup>, A. Lysak <sup>a</sup>, H. Przybylińska <sup>a</sup>, E.I Anila <sup>d</sup>, A. Suchocki <sup>a\*</sup>

<sup>a</sup> Institute of Physics, Polish Academy of Sciences, Al. Lotnikow 32/46, 02-668, Warsaw, Poland

<sup>b</sup> Institute of Experimental Physics, Faculty of Mathematics, Physics and Informatics, University of Gdansk, ul. Wita Stwosza 57, 80-952 Gdańsk, Poland

<sup>c</sup> Sree Sankara Vidyapeetom College, Valayanchirangara, Kerala, 683556, India

<sup>d</sup> CHRIST (Deemed to be University), Bengaluru, Karnataka, 560029, India

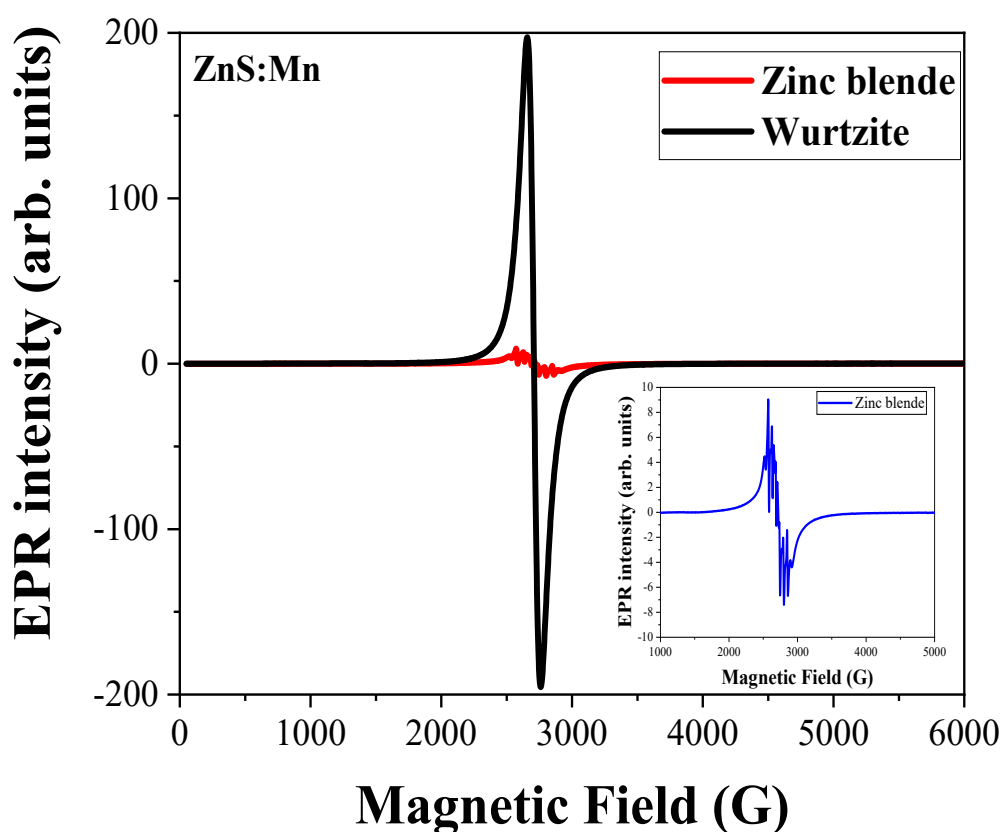

Figure S1. Comparison of room temperature EPR spectra of the zinc blende and wurtzite ZnS samples doped with  $Mn^{2+}$  used in the I-ML experiment. The inset shows an enlarged view of the EPR spectrum of the zinc blende sample. The hyperfine splitting in the wurtzite sample is smeared

out due to considerable spin-spin interaction.

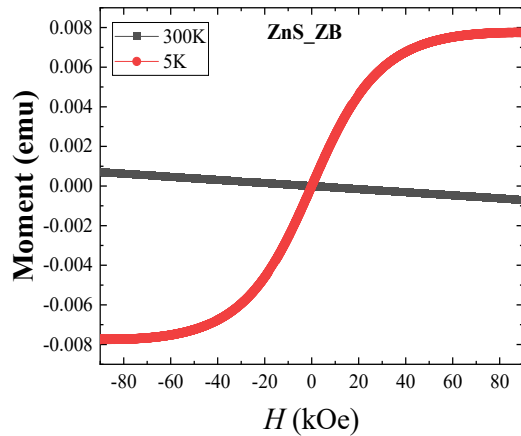

(a)

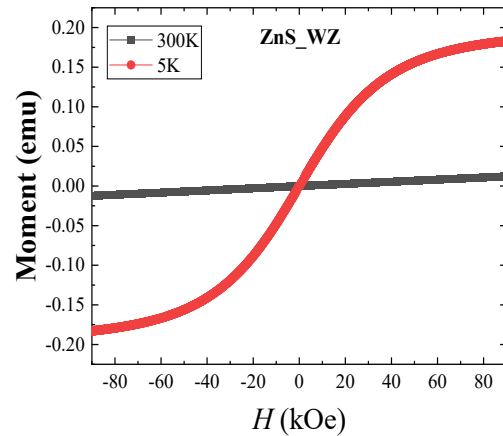

(b)

Figure S2. Comparison of room temperature (RT) and low-temperature SQUID magnetometry measurements of (a) zinc blende and (b) wurtzite ZnS:Mn<sup>2+</sup> samples. The RT paramagnetic behaviour in (a) is obscured by the dominant diamagnetic contribution of the host.
